# Supplementary material for: A Plasma Circular RNA Profile Differentiates Subjects with Alzheimer’s Disease and Mild Cognitive Impairment from Healthy Controls
Source: Int J Mol Sci. 2022 Oct 31;23(21):13232. doi: 10.3390/ijms232113232 (PMC9658433; doi:10.3390/ijms232113232)
Supplement: Supplementary file 1 [file ijms-23-13232-s001.zip]

Archive with 5 entries (5 files):
- Figure S1.pdf
- Figure S2.jpg
- Supplementary Materials caption.pdf
- Table S1.xlsx
- Table S2.xlsx
