# Supplementary material for: A Plasma Circular RNA Profile Differentiates Subjects with Alzheimer’s Disease and Mild Cognitive Impairment from Healthy Controls
Source: Int J Mol Sci. 2022 Oct 31;23(21):13232. doi: 10.3390/ijms232113232 (PMC9658433; doi:10.3390/ijms232113232)
Supplement: Supplementary file 1 [file ijms-23-13232-s001.zip › Table S1.xlsx]

## Sheet: results
miRNA	Target (Seqname)	miRNA	Target	miRNA	Target
hsa-miR-4701-3p	hsa_circRNA_003022	hsa-miR-711	hsa_circRNA_003022	hsa-miR-361-3p	hsa_circRNA_050263
hsa-miR-3185	hsa_circRNA_003022	hsa-miR-2115-5p	hsa_circRNA_003022	hsa-miR-6729-3p	hsa_circRNA_050263
hsa-miR-6788-5p	hsa_circRNA_003022	hsa-miR-6849-5p	hsa_circRNA_003022	hsa-miR-4712-3p	hsa_circRNA_050263
hsa-miR-30c-2-3p	hsa_circRNA_003022	hsa-miR-6865-5p	hsa_circRNA_003022	hsa-miR-3909	hsa_circRNA_050263
hsa-miR-6736-5p	hsa_circRNA_003022	hsa-miR-2681-3p	hsa_circRNA_003022	hsa-miR-4453	hsa_circRNA_050263
hsa-miR-1262	hsa_circRNA_003022	hsa-miR-4768-3p	hsa_circRNA_003022	hsa-miR-194-3p	hsa_circRNA_050263
hsa-miR-6875-5p	hsa_circRNA_003022	hsa-miR-6513-5p	hsa_circRNA_003022	hsa-miR-432-5p	hsa_circRNA_050263
hsa-miR-4320	hsa_circRNA_003022	hsa-miR-4287	hsa_circRNA_003022	hsa-miR-6726-5p	hsa_circRNA_050263
hsa-miR-6803-5p	hsa_circRNA_003022	hsa-miR-7111-3p	hsa_circRNA_003022	hsa-miR-2355-3p	hsa_circRNA_050263
hsa-miR-6748-5p	hsa_circRNA_003022	hsa-miR-30e-5p	hsa_circRNA_003022	hsa-miR-6797-5p	hsa_circRNA_050263
hsa-miR-1303	hsa_circRNA_003022	hsa-miR-30a-5p	hsa_circRNA_003022	hsa-miR-1273h-5p	hsa_circRNA_050263
hsa-miR-149-5p	hsa_circRNA_003022	hsa-miR-30d-5p	hsa_circRNA_003022	hsa-miR-6851-5p	hsa_circRNA_050263
hsa-miR-6833-5p	hsa_circRNA_003022	hsa-miR-3915	hsa_circRNA_003022	hsa-miR-3614-5p	hsa_circRNA_050263
hsa-miR-3607-3p	hsa_circRNA_003022	hsa-miR-4735-3p	hsa_circRNA_003022	hsa-miR-5588-5p	hsa_circRNA_050263
hsa-miR-1182	hsa_circRNA_003022	hsa-miR-4668-5p	hsa_circRNA_003022	hsa-miR-3689d	hsa_circRNA_050263
hsa-miR-637	hsa_circRNA_003022	hsa-miR-30c-5p	hsa_circRNA_003022	hsa-miR-3925-3p	hsa_circRNA_050263
hsa-miR-4720-3p	hsa_circRNA_003022	hsa-miR-30b-5p	hsa_circRNA_003022	hsa-miR-6864-5p	hsa_circRNA_050263
hsa-miR-4784	hsa_circRNA_003022	hsa-miR-1180-3p	hsa_circRNA_003022	hsa-miR-103a-2-5p	hsa_circRNA_102049
hsa-miR-6507-3p	hsa_circRNA_003022	hsa-miR-6840-5p	hsa_circRNA_003022	hsa-miR-455-3p	hsa_circRNA_102049
hsa-miR-3681-3p	hsa_circRNA_003022	hsa-miR-6861-5p	hsa_circRNA_003022	hsa-miR-302c-3p	hsa_circRNA_102049
hsa-miR-6746-3p	hsa_circRNA_003022	hsa-miR-4758-5p	hsa_circRNA_003022	hsa-miR-520d-3p	hsa_circRNA_102049
hsa-miR-664a-5p	hsa_circRNA_003022	hsa-miR-3667-5p	hsa_circRNA_003022	hsa-miR-302b-3p	hsa_circRNA_102049
hsa-miR-592	hsa_circRNA_003022	hsa-miR-598-5p	hsa_circRNA_003022	hsa-miR-302d-3p	hsa_circRNA_102049
hsa-miR-4709-3p	hsa_circRNA_003022	hsa-miR-1185-5p	hsa_circRNA_003022	hsa-miR-197-5p	hsa_circRNA_102049
hsa-miR-3150b-3p	hsa_circRNA_003022	hsa-miR-1290	hsa_circRNA_003022	hsa-miR-222-3p	hsa_circRNA_102049
hsa-miR-921	hsa_circRNA_003022	hsa-miR-27a-3p	hsa_circRNA_003022	hsa-miR-761	hsa_circRNA_102049
hsa-miR-4769-3p	hsa_circRNA_003022	hsa-miR-6763-5p	hsa_circRNA_003022	hsa-miR-129-5p	hsa_circRNA_102049
hsa-miR-3934-5p	hsa_circRNA_003022	hsa-miR-7704	hsa_circRNA_003022	hsa-miR-221-3p	hsa_circRNA_102049
hsa-miR-187-3p	hsa_circRNA_003022	hsa-miR-4497	hsa_circRNA_003022	hsa-miR-889-5p	hsa_circRNA_102049
hsa-miR-5091	hsa_circRNA_003022	hsa-miR-4441	hsa_circRNA_003022	hsa-miR-488-3p	hsa_circRNA_102049
hsa-miR-5586-5p	hsa_circRNA_003022	hsa-miR-770-5p	hsa_circRNA_003022	hsa-miR-192-3p	hsa_circRNA_102049
hsa-miR-593-3p	hsa_circRNA_003022	hsa-miR-7856-5p	hsa_circRNA_003022	hsa-miR-1-5p	hsa_circRNA_102049
hsa-miR-1278	hsa_circRNA_003022	hsa-miR-4660	hsa_circRNA_003022	hsa-miR-214-3p	hsa_circRNA_102049
hsa-miR-5089-5p	hsa_circRNA_003022	hsa-miR-4693-3p	hsa_circRNA_003022	hsa-miR-33a-3p	hsa_circRNA_102049
hsa-miR-639	hsa_circRNA_003022	hsa-miR-4738-3p	hsa_circRNA_003022	hsa-miR-203a-3p	hsa_circRNA_102049
hsa-miR-205-5p	hsa_circRNA_003022	hsa-miR-3923	hsa_circRNA_003022	hsa-miR-549a	hsa_circRNA_102049
hsa-miR-147a	hsa_circRNA_003022	hsa-miR-4642	hsa_circRNA_003022	hsa-miR-646	hsa_circRNA_102049
hsa-miR-4694-3p	hsa_circRNA_003022	hsa-miR-625-5p	hsa_circRNA_003022	hsa-miR-15a-5p	hsa_circRNA_102049
hsa-miR-6751-5p	hsa_circRNA_003022	hsa-miR-211-5p	hsa_circRNA_003022	hsa-miR-302a-3p	hsa_circRNA_102049
hsa-miR-4711-3p	hsa_circRNA_003022	hsa-miR-4450	hsa_circRNA_003022	hsa-miR-483-3p	hsa_circRNA_102049
hsa-miR-4796-3p	hsa_circRNA_003022	hsa-miR-3686	hsa_circRNA_003022	hsa-miR-516a-3p	hsa_circRNA_102049
hsa-miR-3191-5p	hsa_circRNA_003022	hsa-miR-4698	hsa_circRNA_003022	hsa-miR-516b-3p	hsa_circRNA_102049
hsa-miR-4792	hsa_circRNA_003022	hsa-miR-3190-3p	hsa_circRNA_003022	hsa-miR-520f-3p	hsa_circRNA_102049
hsa-miR-548k	hsa_circRNA_003022	hsa-miR-4761-5p	hsa_circRNA_003022	hsa-miR-449b-3p	hsa_circRNA_102049
hsa-miR-3667-3p	hsa_circRNA_003022	hsa-miR-557	hsa_circRNA_003022	hsa-miR-647	hsa_circRNA_102049
hsa-miR-3928-3p	hsa_circRNA_003022	hsa-miR-3144-5p	hsa_circRNA_003022	hsa-miR-592	hsa_circRNA_102049
hsa-miR-30c-1-3p	hsa_circRNA_003022	hsa-miR-194-3p	hsa_circRNA_003022	hsa-miR-21-3p	hsa_circRNA_102049
hsa-miR-217	hsa_circRNA_003022	hsa-miR-6879-3p	hsa_circRNA_003022	hsa-miR-16-5p	hsa_circRNA_102049
hsa-miR-4797-5p	hsa_circRNA_003022	hsa-miR-1238-5p	hsa_circRNA_003022	hsa-miR-15b-5p	hsa_circRNA_102049
hsa-miR-216a-3p	hsa_circRNA_003022	hsa-miR-3672	hsa_circRNA_003022	hsa-miR-526b-5p	hsa_circRNA_102049
hsa-miR-6875-3p	hsa_circRNA_003022	hsa-miR-145-3p	hsa_circRNA_003022	hsa-miR-548d-5p	hsa_circRNA_102049
hsa-miR-6762-3p	hsa_circRNA_003022	hsa-miR-4744	hsa_circRNA_003022	hsa-miR-148b-3p	hsa_circRNA_102049
hsa-miR-4523	hsa_circRNA_003022	hsa-miR-34c-3p	hsa_circRNA_003022	hsa-miR-296-3p	hsa_circRNA_102049
hsa-miR-21-3p	hsa_circRNA_003022	hsa-miR-3143	hsa_circRNA_003022	hsa-miR-520f-5p	hsa_circRNA_102049
hsa-miR-3911	hsa_circRNA_003022	hsa-miR-6789-5p	hsa_circRNA_003022	hsa-miR-342-3p	hsa_circRNA_102049
hsa-miR-7154-5p	hsa_circRNA_003022	hsa-miR-7161-5p	hsa_circRNA_003022	hsa-miR-573	hsa_circRNA_102049
hsa-miR-3074-5p	hsa_circRNA_003022	hsa-miR-6720-5p	hsa_circRNA_003022	hsa-miR-452-5p	hsa_circRNA_102619
hsa-miR-154-5p	hsa_circRNA_003022	hsa-miR-7162-5p	hsa_circRNA_003022	hsa-miR-874-3p	hsa_circRNA_102619
hsa-miR-6855-5p	hsa_circRNA_003022	hsa-miR-6512-3p	hsa_circRNA_003022	hsa-miR-218-1-3p	hsa_circRNA_102619
hsa-miR-34b-3p	hsa_circRNA_003022	hsa-miR-766-5p	hsa_circRNA_003022	hsa-miR-767-5p	hsa_circRNA_102619
hsa-miR-942-5p	hsa_circRNA_003022	hsa-miR-6866-3p	hsa_circRNA_003022	hsa-miR-218-2-3p	hsa_circRNA_102619
hsa-miR-4722-3p	hsa_circRNA_003022	hsa-miR-6802-3p	hsa_circRNA_003022	hsa-miR-605-3p	hsa_circRNA_102619
hsa-miR-6815-5p	hsa_circRNA_003022	hsa-miR-3912-5p	hsa_circRNA_003022	hsa-miR-124-3p	hsa_circRNA_102619
hsa-miR-3978	hsa_circRNA_003022	hsa-miR-3134	hsa_circRNA_003022	hsa-miR-197-5p	hsa_circRNA_102619
hsa-miR-8059	hsa_circRNA_003022	hsa-miR-1908-3p	hsa_circRNA_003022	hsa-miR-18a-3p	hsa_circRNA_102619
hsa-miR-7107-3p	hsa_circRNA_003022	hsa-miR-6847-5p	hsa_circRNA_003022	hsa-miR-506-3p	hsa_circRNA_102619
hsa-miR-7106-3p	hsa_circRNA_003022	hsa-miR-6759-5p	hsa_circRNA_003022	hsa-miR-146b-3p	hsa_circRNA_102619
hsa-miR-6837-3p	hsa_circRNA_003022	hsa-miR-6825-5p	hsa_circRNA_003022	hsa-miR-541-5p	hsa_circRNA_102619
hsa-miR-6888-5p	hsa_circRNA_003022	hsa-miR-6741-5p	hsa_circRNA_003022	hsa-miR-584-5p	hsa_circRNA_102619
hsa-miR-193a-5p	hsa_circRNA_003022	hsa-miR-6794-5p	hsa_circRNA_003022	hsa-miR-193b-5p	hsa_circRNA_102619
hsa-miR-518e-3p	hsa_circRNA_003022	hsa-miR-766-3p	hsa_circRNA_003022	hsa-miR-103a-3p	hsa_circRNA_102619
hsa-miR-4804-5p	hsa_circRNA_003022	hsa-miR-6727-3p	hsa_circRNA_003022	hsa-miR-107	hsa_circRNA_102619
hsa-miR-2116-3p	hsa_circRNA_003022	hsa-miR-516b-3p	hsa_circRNA_003022	hsa-miR-550a-5p	hsa_circRNA_102619
hsa-miR-6740-3p	hsa_circRNA_003022	hsa-miR-516a-3p	hsa_circRNA_003022	hsa-miR-149-5p	hsa_circRNA_102619
hsa-miR-4329	hsa_circRNA_003022	hsa-miR-892b	hsa_circRNA_003022	hsa-miR-586	hsa_circRNA_102619
hsa-miR-3126-5p	hsa_circRNA_003022	hsa-miR-1258	hsa_circRNA_003022	hsa-miR-506-5p	hsa_circRNA_102619
hsa-miR-4661-5p	hsa_circRNA_003022	hsa-miR-5581-5p	hsa_circRNA_003022	hsa-miR-146a-3p	hsa_circRNA_102619
hsa-miR-6871-5p	hsa_circRNA_003022	hsa-miR-556-5p	hsa_circRNA_003022	hsa-miR-891a-3p	hsa_circRNA_102619
hsa-miR-1180-5p	hsa_circRNA_003022	hsa-miR-622	hsa_circRNA_003022	hsa-miR-502-5p	hsa_circRNA_102619
hsa-miR-3190-5p	hsa_circRNA_003022	hsa-miR-5580-5p	hsa_circRNA_003022	hsa-miR-30e-5p	hsa_circRNA_102619
hsa-miR-7974	hsa_circRNA_003022	hsa-miR-6126	hsa_circRNA_003022	hsa-miR-634	hsa_circRNA_102619
hsa-miR-3189-3p	hsa_circRNA_003022	hsa-miR-181a-2-3p	hsa_circRNA_003022	hsa-miR-29b-3p	hsa_circRNA_102619
hsa-miR-6738-3p	hsa_circRNA_003022	hsa-miR-6873-5p	hsa_circRNA_003022	hsa-miR-513a-3p	hsa_circRNA_102619
hsa-miR-3192-5p	hsa_circRNA_003022	hsa-miR-4435	hsa_circRNA_003022	hsa-miR-550a-3-5p	hsa_circRNA_102619
hsa-miR-5681a	hsa_circRNA_003022	hsa-miR-671-3p	hsa_circRNA_003022	hsa-miR-377-5p	hsa_circRNA_102619
hsa-miR-548av-3p	hsa_circRNA_003022	hsa-miR-18b-5p	hsa_circRNA_003022	hsa-miR-515-5p	hsa_circRNA_102619
hsa-miR-4267	hsa_circRNA_003022	hsa-miR-759	hsa_circRNA_003022	hsa-miR-545-5p	hsa_circRNA_102619
hsa-miR-4685-3p	hsa_circRNA_003022	hsa-miR-2110	hsa_circRNA_003022	hsa-miR-18b-5p	hsa_circRNA_102619
hsa-miR-5587-5p	hsa_circRNA_003022	hsa-miR-3611	hsa_circRNA_003022	hsa-miR-18a-5p	hsa_circRNA_102619
hsa-miR-1226-5p	hsa_circRNA_003022	hsa-miR-18a-5p	hsa_circRNA_003022	hsa-miR-383-3p	hsa_circRNA_102619
hsa-miR-6754-5p	hsa_circRNA_003022	hsa-miR-7114-3p	hsa_circRNA_003022	hsa-miR-22-3p	hsa_circRNA_102619
hsa-miR-6867-5p	hsa_circRNA_003022	hsa-miR-6878-5p	hsa_circRNA_003022	hsa-miR-330-3p	hsa_circRNA_102619
hsa-miR-495-5p	hsa_circRNA_003022	hsa-miR-5010-3p	hsa_circRNA_003022	hsa-miR-877-5p	hsa_circRNA_102619
hsa-miR-3064-5p	hsa_circRNA_003022	hsa-miR-8066	hsa_circRNA_003022	hsa-miR-331-5p	hsa_circRNA_102619
hsa-miR-1304-3p	hsa_circRNA_003022	hsa-miR-4799-3p	hsa_circRNA_050263	hsa-miR-598-3p	hsa_circRNA_102619
hsa-miR-219b-3p	hsa_circRNA_003022	hsa-miR-324-5p	hsa_circRNA_050263	hsa-miR-593-5p	hsa_circRNA_102619
hsa-miR-4786-5p	hsa_circRNA_003022	hsa-miR-4538	hsa_circRNA_050263	hsa-miR-338-3p	hsa_circRNA_102619
hsa-miR-3591-3p	hsa_circRNA_003022	hsa-miR-1226-5p	hsa_circRNA_050263	hsa-miR-525-3p	hsa_circRNA_102619
hsa-miR-4743-3p	hsa_circRNA_003022	hsa-miR-4642	hsa_circRNA_050263	hsa-miR-571	hsa_circRNA_102619
hsa-miR-660-3p	hsa_circRNA_003022	hsa-miR-5187-5p	hsa_circRNA_050263	hsa-miR-524-3p	hsa_circRNA_102619
hsa-miR-5004-3p	hsa_circRNA_003022	hsa-miR-4720-5p	hsa_circRNA_050263	hsa-miR-183-5p	hsa_circRNA_102619
hsa-miR-8053	hsa_circRNA_003022	hsa-miR-6803-5p	hsa_circRNA_050263	hsa-miR-559	hsa_circRNA_102619
hsa-miR-128-3p	hsa_circRNA_003022	hsa-miR-6751-5p	hsa_circRNA_050263	hsa-miR-205-3p	hsa_circRNA_102619
hsa-miR-3174	hsa_circRNA_003022	hsa-miR-2355-5p	hsa_circRNA_050263	hsa-miR-495-3p	hsa_circRNA_102619
hsa-miR-1299	hsa_circRNA_003022	hsa-miR-1250-5p	hsa_circRNA_050263	hsa-miR-1207-5p	hsa_circRNA_403959
hsa-miR-4712-5p	hsa_circRNA_003022	hsa-miR-6871-5p	hsa_circRNA_050263	hsa-miR-182-5p	hsa_circRNA_100837
hsa-miR-4766-5p	hsa_circRNA_003022	hsa-miR-6756-5p	hsa_circRNA_050263	hsa-miR-196b-3p	hsa_circRNA_100837
hsa-miR-206	hsa_circRNA_003022	hsa-miR-4781-3p	hsa_circRNA_050263	hsa-miR-22-5p	hsa_circRNA_100837
hsa-miR-1206	hsa_circRNA_003022	hsa-miR-585-3p	hsa_circRNA_050263	hsa-miR-365a-5p	hsa_circRNA_100837
hsa-miR-26b-3p	hsa_circRNA_003022	hsa-miR-7854-3p	hsa_circRNA_050263
hsa-miR-4745-5p	hsa_circRNA_003022	hsa-miR-4721	hsa_circRNA_050263
