# Supplementary material for: A Plasma Circular RNA Profile Differentiates Subjects with Alzheimer’s Disease and Mild Cognitive Impairment from Healthy Controls
Source: Int J Mol Sci. 2022 Oct 31;23(21):13232. doi: 10.3390/ijms232113232 (PMC9658433; doi:10.3390/ijms232113232)
Supplement: Supplementary file 1 [file ijms-23-13232-s001.zip › Table S2.xlsx]

## Sheet: Sheet1
## Functional Terms from KEGG (hsa terms) and REACTOME (R-HSA terms) pathways databases
## For each circRNA, the corresponding p-value (adjusted with Benjamini-Hockberg's correction) is reported
Functional_Term	circRNA_003022	circRNA_102619	circRNA_102049	circRNA_050263
R-HSA-9006925~Intracellular signaling by second messengers	0.0172747	0.0435048	0.0034186	1
R-HSA-975871~MyD88 cascade initiated on plasma membrane	0.12946	1	0.0147775	1
R-HSA-73857~RNA Polymerase II Transcription	2.33246e-05	0.00151126	6.34277e-05	0.0795093
hsa05168:Herpes simplex virus 1 infection	0.000124363	0.0166113	0.0962092	0.899567
hsa05221:Acute myeloid leukemia	1	0.0108719	1	1
R-HSA-9703648~Signaling by FLT3 ITD and TKD mutants	0.383925	0.0237755	0.176644	1
hsa05166:Human T-cell leukemia virus 1 infection	0.164147	0.00203743	0.0115774	1
hsa04152:AMPK signaling pathway	1	0.00474088	0.194598	1
hsa04914:Progesterone-mediated oocyte maturation	1	0.0166113	0.117264	0.623071
R-HSA-2559585~Oncogene Induced Senescence	0.12946	0.0140325	0.000602985	0.248744
R-HSA-1655829~Regulation of cholesterol biosynthesis by SREBP (SREBF)	0.0933171	0.0440513	1	1
R-HSA-426496~Post-transcriptional silencing by small RNAs	0.0514141	0.0140483	0.00736277	0.991265
R-HSA-8948700~Competing endogenous RNAs (ceRNAs) regulate PTEN translation	0.0937185	0.0237755	0.0119085	0.991265
hsa04137:Mitophagy - animal	0.19661	0.00330827	0.00163149	1
hsa05205:Proteoglycans in cancer	7.55193e-06	2.69267e-05	0.000119912	0.482251
R-HSA-9006934~Signaling by Receptor Tyrosine Kinases	0.249249	0.00339487	0.00267144	1
hsa04218:Cellular senescence	0.0091564	0.000326557	0.000113055	0.701246
R-HSA-9675126~Diseases of mitotic cell cycle	1	0.239253	0.0356744	1
R-HSA-2428924~IGF1R signaling cascade	0.249249	0.021453	0.233915	1
R-HSA-975138~TRAF6 mediated induction of NFkB and MAP kinases upon TLR7/8 or 9 activation	0.230696	1	0.00736277	1
R-HSA-8853884~Transcriptional Regulation by VENTX	1	0.0140483	0.0392473	0.991265
R-HSA-212436~Generic Transcription Pathway	8.9928e-05	0.00611095	6.34277e-05	0.143391
R-HSA-5663213~RHO GTPases Activate WASPs and WAVEs	0.302593	0.0440513	0.0690196	1
hsa05145:Toxoplasmosis	0.0795555	0.0342044	0.0774856	1
hsa05160:Hepatitis C	0.00366784	0.0229198	0.118434	0.933077
hsa01524:Platinum drug resistance	0.051791	0.00170009	0.0105562	0.933077
hsa04722:Neurotrophin signaling pathway	7.55193e-06	0.0171667	0.000119912	1
R-HSA-168898~Toll-like Receptor Cascades	0.302593	1	0.0319733	1
hsa04668:TNF signaling pathway	0.118433	0.0187154	0.207286	1
hsa04350:TGF-beta signaling pathway	0.176504	0.104917	0.0385589	1
R-HSA-2173796~SMAD2/SMAD3:SMAD4 heterotrimer regulates transcription	1	0.0570666	0.0366944	1
hsa04014:Ras signaling pathway	0.000124363	0.00616846	0.00753614	0.939357
hsa05163:Human cytomegalovirus infection	0.00126193	0.00048343	0.00450344	1
R-HSA-1280215~Cytokine Signaling in Immune system	0.176876	0.03905	0.0460835	1
hsa05211:Renal cell carcinoma	0.000199227	0.000481087	0.132119	1
hsa04520:Adherens junction	0.0711158	0.130276	0.000597166	0.933077
hsa04340:Hedgehog signaling pathway	0.0138962	1	0.0435082	1
R-HSA-9664417~Leishmania phagocytosis	0.0933171	0.0359344	0.0392473	0.991265
R-HSA-1257604~PIP3 activates AKT signaling	0.0933171	0.0440513	0.00808609	1
hsa05224:Breast cancer	0.139389	0.000326557	0.000527857	1
hsa05152:Tuberculosis	0.0224751	1	1	1
R-HSA-166058~MyD88:MAL(TIRAP) cascade initiated on plasma membrane	0.249249	1	0.0171406	1
hsa05200:Pathways in cancer	0.0721527	5.77427e-05	7.15789e-06	1
hsa05162:Measles	0.0214011	0.0217451	0.00337039	1
hsa04915:Estrogen signaling pathway	1	0.0111382	1	1
hsa05203:Viral carcinogenesis	0.0127845	0.224429	0.00336294	1
hsa05167:Kaposi sarcoma-associated herpesvirus infection	0.000417906	0.00287983	0.0011269	0.701246
hsa04068:FoxO signaling pathway	0.0224751	0.00170009	0.00108394	1
hsa05161:Hepatitis B	0.00045718	0.00048343	0.00168261	1
R-HSA-9614085~FOXO-mediated transcription	0.342723	0.12075	0.0017623	1
hsa04910:Insulin signaling pathway	0.133631	0.0967193	0.0226493	1
R-HSA-2404192~Signaling by Type 1 Insulin-like Growth Factor 1 Receptor (IGF1R)	0.278466	0.0231734	0.253449	1
R-HSA-2173793~Transcriptional activity of SMAD2/SMAD3:SMAD4 heterotrimer	0.706346	0.0359344	0.0185909	1
hsa04713:Circadian entrainment	0.156874	0.0379378	1	1
R-HSA-69236~G1 Phase	0.41112	0.426281	0.0205118	1
R-HSA-9615017~FOXO-mediated transcription of oxidative stress, metabolic and neuronal genes	1	0.355375	0.00267144	1
R-HSA-69231~Cyclin D associated events in G1	0.41112	0.426281	0.0205118	1
R-HSA-2428928~IRS-related events triggered by IGF1R	0.248041	0.0359344	0.214306	1
R-HSA-8934593~Regulation of RUNX1 Expression and Activity	0.00314228	0.00218023	0.00400569	1
hsa03013:Nucleocytoplasmic transport	0.0127845	0.0255088	0.166026	1
hsa05417:Lipid and atherosclerosis	0.000699002	0.104917	0.000259632	1
R-HSA-194138~Signaling by VEGF	0.240171	0.0359344	0.00267144	1
hsa04215:Apoptosis - multiple species	0.0203624	1	0.0102175	1
hsa04071:Sphingolipid signaling pathway	0.0112424	0.0317671	0.0203213	1
R-HSA-9661069~Defective binding of RB1 mutants to E2F1,(E2F2, E2F3)	0.249249	0.207116	0.00400569	1
hsa05120:Epithelial cell signaling in Helicobacter pylori infection	0.0317149	1	0.252789	1
hsa05215:Prostate cancer	0.00262337	0.00474088	0.0012756	0.711376
hsa05169:Epstein-Barr virus infection	0.00746691	0.0236354	0.0102175	1
R-HSA-162582~Signal Transduction	0.249249	0.0131566	0.0034186	1
R-HSA-9024446~NR1H2 and NR1H3-mediated signaling	0.41112	0.270782	0.0484381	1
R-HSA-9006115~Signaling by NTRK2 (TRKB)	0.302593	0.0471137	0.519731	1
hsa05219:Bladder cancer	0.0271322	0.0342044	0.00168261	1
hsa05100:Bacterial invasion of epithelial cells	0.133221	0.00117939	0.220586	1
hsa04550:Signaling pathways regulating pluripotency of stem cells	0.0307065	0.00120747	0.0608391	0.929876
hsa04066:HIF-1 signaling pathway	0.00902309	0.0938372	1	1
hsa04012:ErbB signaling pathway	0.000156544	0.00300235	0.0698829	1
hsa05231:Choline metabolism in cancer	1	0.0405113	1	1
hsa04728:Dopaminergic synapse	0.0910727	0.0236354	0.218255	1
hsa05207:Chemical carcinogenesis - receptor activation	0.012693	1	1	1
R-HSA-5357801~Programmed Cell Death	0.361549	0.350017	0.0218263	1
hsa04144:Endocytosis	0.000199227	0.0182071	0.00271534	0.482251
R-HSA-9022692~Regulation of MECP2 expression and activity	0.230696	0.0357194	0.00251568	1
R-HSA-3700989~Transcriptional Regulation by TP53	0.0542632	0.0957504	0.00910688	1
R-HSA-2262752~Cellular responses to stress	0.28186	0.0493229	0.00736277	1
hsa05235:PD-L1 expression and PD-1 checkpoint pathway in cancer	0.17414	0.00203743	0.258784	1
hsa04145:Phagosome	0.021117	1	1	1
hsa04213:Longevity regulating pathway - multiple species	0.176504	0.00220385	0.266071	1
hsa01521:EGFR tyrosine kinase inhibitor resistance	0.00165902	0.0171667	0.0430008	1
R-HSA-9664407~Parasite infection	0.0933171	0.0359344	0.0392473	0.991265
hsa04110:Cell cycle	0.118433	0.00203743	0.00221191	0.482251
hsa05130:Pathogenic Escherichia coli infection	0.0150022	0.0451278	0.0124485	0.711376
hsa05017:Spinocerebellar ataxia	0.073563	0.0278399	1	1
R-HSA-2559583~Cellular Senescence	0.70533	0.0570666	0.0107502	0.991265
R-HSA-187037~Signaling by NTRK1 (TRKA)	0.414052	0.0359344	0.273479	1
hsa04010:MAPK signaling pathway	0.0155743	0.00616846	0.00753614	1
R-HSA-166520~Signaling by NTRKs	0.361549	0.0299043	0.118613	1
R-HSA-1280218~Adaptive Immune System	0.414052	0.555944	0.00808609	1
R-HSA-9687139~Aberrant regulation of mitotic cell cycle due to RB1 defects	1	0.197971	0.025066	1
R-HSA-168179~Toll Like Receptor TLR1:TLR2 Cascade	0.28186	1	0.0208115	1
hsa04115:p53 signaling pathway	0.000199227	0.000326557	8.70772e-05	0.482251
hsa04510:Focal adhesion	0.000974632	0.00797764	0.0099034	1
hsa05210:Colorectal cancer	0.00610582	0.000326557	0.000119912	1
hsa04151:PI3K-Akt signaling pathway	0.0239835	0.0379378	0.0147705	1
R-HSA-170834~Signaling by TGF-beta Receptor Complex	0.282993	0.0435048	0.0217875	1
hsa05220:Chronic myeloid leukemia	0.000417906	6.82681e-05	0.00052275	1
R-HSA-5653656~Vesicle-mediated transport	0.327484	0.0435048	0.0135802	1
hsa05418:Fluid shear stress and atherosclerosis	0.00593144	0.063279	0.0260842	1
R-HSA-168142~Toll Like Receptor 10 (TLR10) Cascade	0.12946	1	0.0147775	1
hsa05032:Morphine addiction	0.0317149	1	1	1
R-HSA-450294~MAP kinase activation	0.311525	1	0.0316671	1
R-HSA-6806834~Signaling by MET	0.389027	0.021453	0.595778	1
hsa04371:Apelin signaling pathway	1	0.00328	0.284211	1
R-HSA-5654708~Downstream signaling of activated FGFR3	1	0.0471137	1	1
hsa04926:Relaxin signaling pathway	0.0127845	0.00520893	0.192225	1
hsa04670:Leukocyte transendothelial migration	0.0234465	1	0.139778	1
hsa04933:AGE-RAGE signaling pathway in diabetic complications	0.0330364	0.00633564	0.00333549	1
R-HSA-9664422~FCGR3A-mediated phagocytosis	0.0933171	0.0359344	0.0392473	0.991265
hsa04621:NOD-like receptor signaling pathway	1	1	0.0284646	1
R-HSA-74160~Gene expression (Transcription)	2.14346e-06	5.87351e-05	6.34277e-05	0.0450908
hsa04064:NF-kappa B signaling pathway	1	1	0.0435082	1
hsa04140:Autophagy - animal	0.090379	6.82681e-05	0.0160442	1
hsa05223:Non-small cell lung cancer	0.00179209	0.00330827	0.00163149	1
hsa04917:Prolactin signaling pathway	0.0317149	0.00117381	0.0385589	1
hsa05213:Endometrial cancer	0.0194088	0.0417256	0.0547869	1
R-HSA-168256~Immune System	0.178618	0.328769	0.0101575	1
R-HSA-9006931~Signaling by Nuclear Receptors	0.386863	0.0108954	0.0567868	1
R-HSA-114452~Activation of BH3-only proteins	0.0370719	1	0.072694	1
hsa05212:Pancreatic cancer	0.00182	0.0010904	0.0012756	1
R-HSA-166166~MyD88-independent TLR4 cascade	0.280939	1	0.0258504	1
R-HSA-168181~Toll Like Receptor 7/8 (TLR7/8) Cascade	0.249249	1	0.00808609	1
hsa05132:Salmonella infection	0.0127845	0.00347605	0.0198976	0.482251
R-HSA-168138~Toll Like Receptor 9 (TLR9) Cascade	0.178618	1	0.00588858	1
R-HSA-2029482~Regulation of actin dynamics for phagocytic cup formation	0.0789802	0.0435048	0.117783	1
hsa04730:Long-term depression	1	0.0109589	1	1
hsa04211:Longevity regulating pathway	0.0155867	0.00203743	0.0500432	1
hsa04611:Platelet activation	0.271435	0.0134753	1	1
R-HSA-1643685~Disease	0.142887	0.0478698	0.0034186	1
hsa05131:Shigellosis	0.0377987	0.0349991	0.00208033	0.482251
R-HSA-2219528~PI3K/AKT Signaling in Cancer	0.28186	0.122484	0.0392473	1
hsa05165:Human papillomavirus infection	1	0.0342044	0.0855296	1
R-HSA-5663202~Diseases of signal transduction by growth factor receptors and second messengers	0.0491559	0.0435048	6.34277e-05	1
hsa05225:Hepatocellular carcinoma	0.210254	0.000761616	0.0027725	1
hsa04928:Parathyroid hormone synthesis, secretion and action	0.213764	0.0394705	1	1
R-HSA-166016~Toll Like Receptor 4 (TLR4) Cascade	0.302593	1	0.0391571	1
R-HSA-6804758~Regulation of TP53 Activity through Acetylation	0.361549	0.387464	0.424	0.0493666
hsa05170:Human immunodeficiency virus 1 infection	0.00126193	0.00941439	0.0774856	1
hsa05226:Gastric cancer	0.213764	0.0134753	0.0158303	1
R-HSA-5689896~Ovarian tumor domain proteases	0.5927	0.426281	0.0392473	1
hsa04015:Rap1 signaling pathway	0.00691801	0.00474088	0.00168261	0.482251
hsa04360:Axon guidance	0.00345357	1	0.106266	1
R-HSA-168188~Toll Like Receptor TLR6:TLR2 Cascade	0.249249	1	0.0171406	1
R-HSA-181438~Toll Like Receptor 2 (TLR2) Cascade	0.28186	1	0.0208115	1
R-HSA-8986944~Transcriptional Regulation by MECP2	0.12946	0.0274286	0.00568644	1
R-HSA-5218921~VEGFR2 mediated cell proliferation	0.28186	1	0.0122125	1
R-HSA-109606~Intrinsic Pathway for Apoptosis	0.0036618	0.277315	0.0107502	1
R-HSA-9006936~Signaling by TGFB family members	0.0370719	0.0435048	0.0208115	1
hsa04923:Regulation of lipolysis in adipocytes	1	0.0349991	1	1
R-HSA-8943723~Regulation of PTEN mRNA translation	0.0491559	0.0070495	0.0186504	1
hsa05214:Glioma	0.000709483	0.000956848	0.000468608	0.734225
R-HSA-6802952~Signaling by BRAF and RAF1 fusions	0.0597986	1	0.0424594	1
hsa04810:Regulation of actin cytoskeleton	0.0528963	0.0217451	0.0260842	1
hsa05218:Melanoma	0.014514	0.000644906	0.00163149	0.482251
hsa05222:Small cell lung cancer	0.0223896	0.0134753	0.00163149	1
hsa04664:Fc epsilon RI signaling pathway	0.00787422	0.104917	0.0674849	1
R-HSA-8939211~ESR-mediated signaling	0.249249	0.0058428	0.0458111	1
R-HSA-4420097~VEGFA-VEGFR2 Pathway	0.119233	0.0357194	0.000872395	1
hsa04660:T cell receptor signaling pathway	0.0555162	0.0639796	0.0111523	1
hsa04931:Insulin resistance	0.0203624	0.0255088	0.0312193	1
R-HSA-4086398~Ca2+ pathway	0.507806	0.0448857	0.0554179	1
hsa05206:MicroRNAs in cancer	1	0.0317936	0.0814599	1
R-HSA-2428933~SHC-related events triggered by IGF1R	0.334516	0.0070495	0.390495	1
R-HSA-2559580~Oxidative Stress Induced Senescence	1	0.109376	0.0186504	1
hsa05135:Yersinia infection	0.0264421	0.000761616	0.00295087	0.933077
R-HSA-168176~Toll Like Receptor 5 (TLR5) Cascade	0.12946	1	0.0147775	1
R-HSA-975155~MyD88 dependent cascade initiated on endosome	0.248041	1	0.00758253	1
R-HSA-8953897~Cellular responses to stimuli	0.335678	0.0566383	0.0106566	1
hsa04150:mTOR signaling pathway	0.0203624	0.0602283	0.258784	1
R-HSA-937061~TRIF(TICAM1)-mediated TLR4 signaling	0.280939	1	0.0258504	1
hsa04210:Apoptosis	0.17414	0.230253	0.000424799	1
hsa01522:Endocrine resistance	0.0031159	5.77427e-05	0.000119912	0.933077
hsa04935:Growth hormone synthesis, secretion and action	0.0166109	0.000560839	0.0698829	1
R-HSA-199991~Membrane Trafficking	0.222459	0.0217834	0.00736277	1
hsa04390:Hippo signaling pathway	0.104864	0.0375318	0.0274434	1
R-HSA-109581~Apoptosis	0.178618	0.253202	0.0276361	1
R-HSA-9009391~Extra-nuclear estrogen signaling	0.0370719	0.000643334	0.123202	1
R-HSA-5683057~MAPK family signaling cascades	0.532996	0.29116	0.0233374	1
R-HSA-426486~Small interfering RNA (siRNA) biogenesis	0.651121	0.351896	0.0186504	1
hsa04062:Chemokine signaling pathway	0.0284025	1	1	1
R-HSA-9659787~Aberrant regulation of mitotic G1/S transition in cancer due to RB1 defects	0.249249	0.207116	0.00400569	1
